# Supplementary material
Source: Springer Nature journal article supplement (https://www.springermedizin.de/resource/supplementary/12885_2010_2571_MOESM6_ESM.pdf/9462586)

A

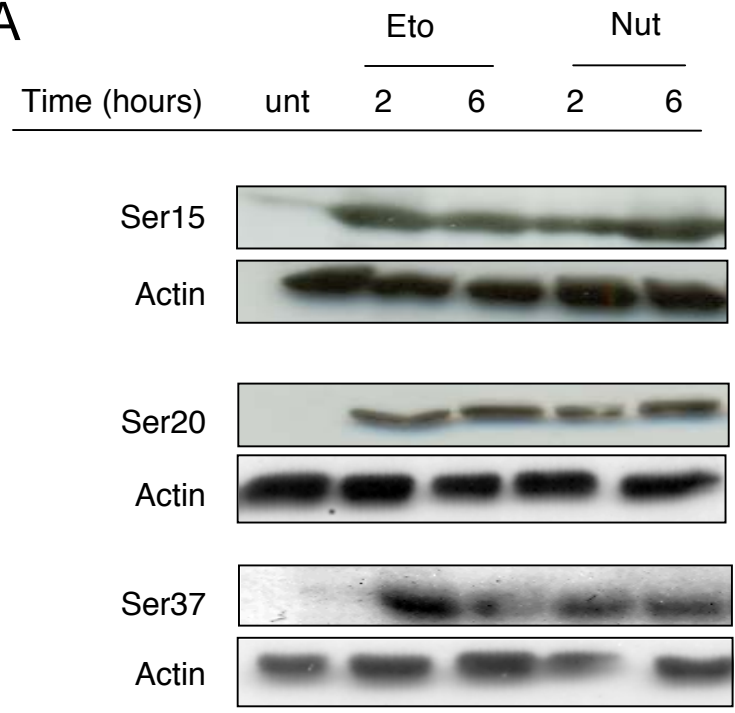

B

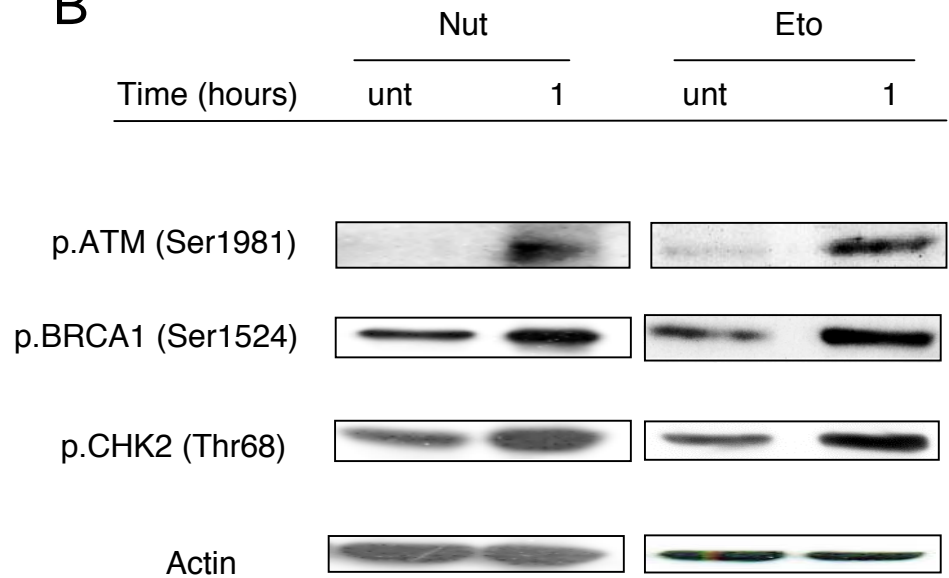

C

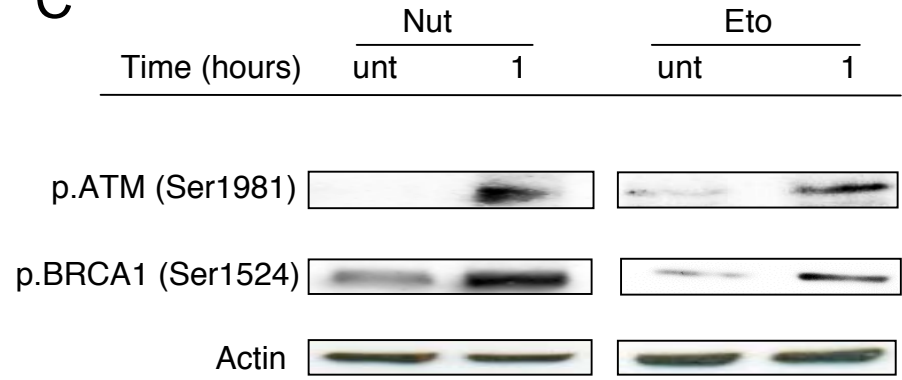

Supplement: MOESM6 [file 9462586]
